# Supplementary material
Source: Springer Nature journal article supplement (https://www.springermedizin.de/resource/supplementary/12943_2009_559_MOESM12_ESM.pdf/9554970)
Supplement: MOESM12 [file 9554970]

| Go Term                                                                                                                                                              | Gene Count | Genes                                                                                                                                                                                                      |
|----------------------------------------------------------------------------------------------------------------------------------------------------------------------|------------|------------------------------------------------------------------------------------------------------------------------------------------------------------------------------------------------------------|
| Gene expression, Transcription, Transcription factor activity                                                                                                        | 174        | INCLUDING - BARHL2, BMP2, EBF1, EBF2, EBF3, FOXF2, NKX2-1, NR2E1, NR4A2, ONECUT1, PAX1, PAX2, PAX3, PAX6, PAX7, POU4F1, RARA, RAX, SALL1, SALL3, SIN3A, STAT3, TCF7, TFAP2A, TFAP2C, TNFAIP1, TRPC4, TSHZ3 |
| Apoptosis, DNA repair, Response to DNA damage stimulus, Regulation of Programed cell death.                                                                          | 17         | ABL1, ADRA1A, ALOX12, BCL2L11, FOXC1, GDNF, GULP1, HRK, PAX3, PAX7, POU4F1, PRKCZ, RUNX3, SEMA6A, SOX9, TLR2, VDAC1                                                                                        |
| Protein processing, Protein kinase activity, Serine/threonine protein kinase, Post-translational protein modification, Ubiquitin-dependent protein catabolic process | 26         | ABL1, BMP4, CBX8, CCND1, CDC14B, CDKL2, DUSP4, EFNA4, LRRK1, NPAS2, NPR2, NTRK2, PDK4, PPP2R3B, PRKCZ, PTCH1, PTPRG, RPS6KA3, SHH, SIM1, TDGF1, TNIK, UBE2C, USP1, WNK3, WNT2                              |
| Cell migration, Cell motility, Cell-cell signaling, G-protein coupled receptor, Protein signaling pathway                                                            | 20         | ALOX12, BARHL2, CCK, EGFL7, FOXC1, FOXE1, GDNF, NKX2-1, OTX2, PAX6, PODXL, POU4F1, RGS20, SEMA6A, SHH, STAT3, TBX5, TDGF1, TLX3, WNT2                                                                      |
| Cell cycle process, Cell fate commitment, Regulation of cell cycle, Regulation of cell differentiation, Regulation of cell proliferation                             | 26         | ABL1, ARHGAP20, BMP2, BMP4, CCND1, CNTFR, DBC1, DLX5, DUSP4, FOXC1, KLF11, MLF1, NKX2-2, PDX1, PMP22, PPP2R3B, PTCH1, PTGS2, RUNX3, SHC1, SHH, SOX9, TBX18, TBX2, UBE2C, WNT2                              |
